# Supplementary material
Source: publisher figshare collection journal article supplement (https://sage.figshare.com/ndownloader/files/37570213)
Supplement: Supplementary file 1 [file 37570213]

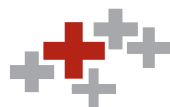

## CARE Checklist – 2016: Information for writing a case report

| Topic                         | Item       | Checklist item description                                                                           | Line/Page                           |
|-------------------------------|------------|------------------------------------------------------------------------------------------------------|-------------------------------------|
| <b>Title</b>                  | <b>1</b>   | The words “case report” should be in the title along with the area of focus                          | <input checked="" type="checkbox"/> |
| <b>Key Words</b>              | <b>2</b>   | Four to seven key words—include “case report” as one of the key words                                | <input checked="" type="checkbox"/> |
| <b>Abstract</b>               | <b>3a</b>  | Background: What does this case report add to the medical literature?                                | <input checked="" type="checkbox"/> |
|                               | <b>3b</b>  | Case summary: chief complaint, diagnoses, interventions, and outcomes                                | <input checked="" type="checkbox"/> |
|                               | <b>3c</b>  | Conclusion: What is the main “take-away” lesson from this case?                                      | <input checked="" type="checkbox"/> |
| <b>Introduction</b>           | <b>4</b>   | The current standard of care and contributions of this case—with references (1-2 paragraphs)         | <input checked="" type="checkbox"/> |
| <b>Timeline</b>               | <b>5</b>   | Information from this case report organized into a timeline (table or figure)                        | <input checked="" type="checkbox"/> |
| <b>Patient Information</b>    | <b>6a</b>  | De-identified demographic and other patient or client specific information                           | <input checked="" type="checkbox"/> |
|                               | <b>6b</b>  | Chief complaint—what prompted this visit?                                                            | <input checked="" type="checkbox"/> |
|                               | <b>6c</b>  | Relevant history including past interventions and outcomes                                           | <input checked="" type="checkbox"/> |
| <b>Physical Exam</b>          | <b>7</b>   | Relevant physical examination findings                                                               | <input checked="" type="checkbox"/> |
| <b>Diagnostic Assessment</b>  | <b>8a</b>  | Evaluations such as surveys, laboratory testing, imaging, etc.                                       | <input checked="" type="checkbox"/> |
|                               | <b>8b</b>  | Diagnostic reasoning including other diagnoses considered and challenges                             | <input checked="" type="checkbox"/> |
|                               | <b>8c</b>  | Consider tables or figures linking assessment, diagnoses and interventions                           | <input checked="" type="checkbox"/> |
|                               | <b>8d</b>  | Prognostic characteristics where applicable                                                          | <input checked="" type="checkbox"/> |
| <b>Interventions</b>          | <b>9a</b>  | Types such as life-style recommendations, treatments, medications, surgery                           | <input checked="" type="checkbox"/> |
|                               | <b>9b</b>  | Intervention administration such as dosage, frequency and duration                                   | <input checked="" type="checkbox"/> |
|                               | <b>9c</b>  | Note changes in intervention with explanation                                                        | <input checked="" type="checkbox"/> |
|                               | <b>9d</b>  | Other concurrent interventions                                                                       | <input checked="" type="checkbox"/> |
| <b>Follow-up and Outcomes</b> | <b>10a</b> | Clinician assessment (and patient or client assessed outcomes when appropriate)                      | <input checked="" type="checkbox"/> |
|                               | <b>10b</b> | Important follow-up diagnostic evaluations                                                           | <input checked="" type="checkbox"/> |
|                               | <b>10c</b> | Assessment of intervention adherence and tolerability, including adverse events                      | <input checked="" type="checkbox"/> |
| <b>Discussion</b>             | <b>11a</b> | Strengths and limitations in your approach to this case                                              | <input checked="" type="checkbox"/> |
|                               | <b>11b</b> | Specify how this case report informs practice or Clinical Practice Guidelines (CPG)                  | <input checked="" type="checkbox"/> |
|                               | <b>11c</b> | How does this case report suggest a testable hypothesis?                                             | <input checked="" type="checkbox"/> |
|                               | <b>11d</b> | Conclusions and rationale                                                                            | <input checked="" type="checkbox"/> |
| <b>Patient Perspective</b>    | <b>12</b>  | When appropriate include the assessment of the patient or client on this episode of care             | <input checked="" type="checkbox"/> |
| <b>Informed Consent</b>       | <b>13</b>  | Informed consent from the person who is the subject of this case report is required by most journals | <input checked="" type="checkbox"/> |
| <b>Additional Information</b> | <b>14</b>  | Acknowledgement section; Competing Interests; IRB approval when required                             | <input checked="" type="checkbox"/> |
